# Supplementary material
Source: PubMed Central journal article supplement (PMC3194891)
Supplement: supp_193_21_6057__1.pdf [file supp_193_21_6057__1.pdf]

## Supplementary Fig. 1

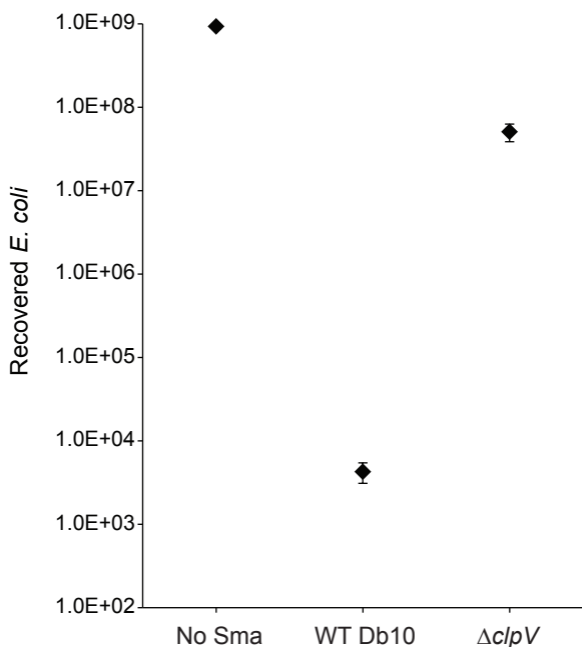

**FIG. S1. Action of the Sma Db10 Type VI secretion system against *Escherichia coli* at a ratio of 1:1.** Recovery of viable *E. coli* MC4100 cells after 4 h co-culture with the Sma strain indicated at 37°C, with an initial ratio of 1 Sma : 1 *E. coli* (See Methods for full details). Wild type Sma Db10 (WT Db10) is compared with the T6SS mutant strain SJC3 ( $\Delta clpV$ ). Points show mean  $\pm$  SEM (n=6)
