# Supplementary material
Source: PubMed Central journal article supplement (PMC3194891)
Supplement: supp_193_21_6057__2.pdf [file supp_193_21_6057__2.pdf]

**SUPPLEMENTARY TABLE 1: Oligonucleotide primers**

| Name                             | Sequence (5'-3')                       | Description                                                                                                   |
|----------------------------------|----------------------------------------|---------------------------------------------------------------------------------------------------------------|
| <i>Primers used for cloning:</i> |                                        |                                                                                                               |
| SC2001                           | TATATCTAGAACCGGTATCGTGATCGC            | Forward primer to clone upstream flanking region of SMA2274 for marker exchange (XbaI)                        |
| SC2002                           | TATCAAGCTTTCAAGACATGTTTTCTCAGGTCTC     | Reverse primer to clone upstream flanking region of SMA2274 for marker exchange (HindIII)                     |
| SC2003                           | TATAAAGCTTCCCGGGTTTCAGGCATAACGCCGC     | Forward primer to clone downstream flanking region of SMA2274 for marker exchange (HindIII)                   |
| SC2004                           | TATAGTCGACCGGTTTGAGCATGATCTCC          | Reverse primer to clone downstream flanking region of SMA2274 for marker exchange (SalI)                      |
| SC2005                           | TATATCTAGACATCTCGGCCAGGTGAGC           | Forward primer to clone upstream flanking region of SMA2254 for marker exchange (XbaI)                        |
| SC2006                           | TATAAAGCTTTCAGCCATGCTATTTCTCGAGTC      | Reverse primer to clone upstream flanking region of SMA2254 for marker exchange [SJC4] (HindIII)              |
| SC2059                           | TATAAAGCTTCCCGCATGCTATTTCTCGAGTC       | Reverse primer to clone upstream flanking region of SMA2254 for marker exchange [SJC12] (HindIII)             |
| SC2007                           | TATAAAGCTTGATATCCCGCAAGGAACCGAAAG      | Forward primer to clone downstream flanking region of SMA2254 for marker exchange (HindIII)                   |
| SC2008                           | TATAGTCGACTTCTCGCGCTGGCTTTC            | Reverse primer to clone downstream flanking region of SMA2254 for marker exchange (SalI)                      |
| SC2009                           | TATATCTAGAAACCGCAGCTGAAATCC            | Forward primer to clone upstream flanking region of SMA2271 for marker exchange (XbaI)                        |
| SC2060                           | TATAAAGCTTATCGTTATGTTCCAGGCGCT         | Reverse primer to clone upstream flanking region of SMA2271 for marker exchange (HindIII)                     |
| SC2011                           | TATAAAGCTTCCCGGGCTGAAGACATAGGGTAAGCGCA | Forward primer to clone downstream flanking region of SMA2271 for marker exchange (HindIII)                   |
| SC2012                           | TATAGTCGACCCTCCACGTTTGGCAG             | Reverse primer to clone downstream flanking region of SMA2271 for marker exchange (SalI)                      |
| SC2043                           | TATATCTAGACCTGCAGAAATCCACCAACG         | Forward primer to clone upstream flanking region of SMA2252 for marker exchange (XbaI)                        |
| SC2053                           | TATAAAGCTTCTCATCATAGGAATCTCGTCCG       | Reverse primer to clone upstream flanking region of SMA2252 for marker exchange (HindIII)                     |
| SC2045                           | TATAAAGCTTCCCGGGAAGGTCGACTGACCTACCCG   | Forward primer to clone downstream flanking region of SMA2252 for marker exchange (HindIII)                   |
| SC2046                           | TATAGGGCCATCTCGGTGATCGAGACG            | Reverse primer to clone downstream flanking region of SMA2252 for marker exchange (ApaI)                      |
| SM001                            | TATATCTAGAGGATTTATCCCGCAGAACG          | Forward primer to clone upstream flanking region of SMA2462 for marker exchange (XbaI)                        |
| SM002                            | TATAAAGCTTTCAGGGCATCGGGGATCG           | Reverse primer to clone upstream flanking region of SMA2462 for marker exchange (HindIII)                     |
| SM003                            | TATAAAGCTTCCCGGAGGCTAAATCTGC           | Forward primer to clone downstream flanking region of SMA2462 for marker exchange (HindIII)                   |
| SM004                            | TATAGGGCCCGCACTGGAAGGAATATCAGAAACC     | Reverse primer to clone downstream flanking region of SMA2462 for marker exchange (ApaI)                      |
| SC2039                           | TATATCTAGACCTCATCCACCATCAACATGAGC      | Forward primer to clone SMA2274 3' end, to flank non-disruptive lacZ insertion, for marker exchange (XbaI)    |
| SC2040                           | TGTGAAGCTTTATGCTGAAATGACAAATGAATTCG    | Reverse primer to clone SMA2274 3' end, to flank non-disruptive lacZ insertion, for marker exchange (HindIII) |
| SM007                            | TATAAAGCTTAAAGGAGAACGATGACCATGATTACGG  | Forward Primer to clone lacZ 5' end (HindIII)                                                                 |
| SM008                            | GCTCATCGATAATTTCCACG                   | Reverse Primer to clone lacZ 5' end (ClaI)                                                                    |
| SM009                            | TTTCCATATGGGGATGGTG                    | Forward primer to clone lacZ 3' end (NdeI)                                                                    |
| SM010                            | TATAGGTACCCCGGGTATTTTTGACACAGACCAACTG  | Reverse primer to clone lacZ 3' end (KpnI)                                                                    |
| SC2049                           | TATAGGATCCATGAACGATAAACGCCAC           | Forward primer to clone SMA2271 into pSUPROM (BamHI)                                                          |
| SC2050                           | TATATCTAGATTACCTATGCTTTTCAGATCGAAGTG   | Reverse primer to clone SMA2271 into pSUPROM (XbaI)                                                           |
| SC2148                           | TATAGGATCCATGATGACCAACCCATCTCGC        | Forward primer to clone SMA2252 into pSUPROM (BamHI)                                                          |
| SC2149                           | TATATCTAGAGTCAGTCGACCTTTTTACGGG        | Reverse primer to clone SMA2252 into pSUPROM (XbaI)                                                           |
| SMA2274F                         | TCACATATGCTGAAATCAGCCGCTCGGTATTATTTGG  | Forward primer to clone SMA2274 into pSUPROM (NdeI+blunt)                                                     |
| SMA2274R                         | AGGATCCTTATGCTGAAATGACAAATGAATTCGTGG   | Reverse primer to clone SMA2274 into pSUPROM (BamHI+blunt)                                                    |
| SMA2263F                         | TCACATATGCTATTGATATGCTCTGAAA           | Forward primer to clone SMA2263 into pET15b-TEV (NdeI)                                                        |
| SMA2263R                         | AGGATCCTTAAAGCTTCCGGTTTTCTTGA          | Reverse primer to clone SMA2263 into pET15b-TEV (BamHI)                                                       |

*Primers used for transcript mapping by RT-PCR:*

|        |                                           |                                          |
|--------|-------------------------------------------|------------------------------------------|
| SM028  | TGTACGACCGTGCGCAC                         | RT-PCR mapping forward primer product 1  |
| SM025  | CTCCGTGAGCAATGCATTG                       | RT-PCR mapping forward primer product 2  |
| SM069  | ATCACGGTGCATATCTGGGG                      | RT-PCR mapping forward primer product 3  |
| SM029  | AGACTGACGCTGGCGATAGAG                     | RT-PCR mapping forward primer product 4  |
| SC2083 | AACTGGCTGGCGATCTCC                        | RT-PCR mapping forward primer product 5  |
| SC2139 | TATAGGATCCAGCAAAAACCGTGCCTC               | RT-PCR mapping forward primer product 6  |
| SM031  | AAGTGACCCGCAATCTCG                        | RT-PCR mapping forward primer product 7  |
| GE002  | ACAACCCGGGCTATTACAGC                      | RT-PCR mapping forward primer product 8  |
| SC2065 | TATACATATGGCCGATTCAGGATCC                 | RT-PCR mapping forward primer product 9  |
| GE004  | GGAACATCAAGGAAAACCGC                      | RT-PCR mapping forward primer product 10 |
| SC2071 | TATACATATGGAAAACCTGCTCAATGCTTTATCG        | RT-PCR mapping forward primer product 11 |
| SC2269 | TATAAAGCTTACCCCGGGTAAATCCCGTTC            | RT-PCR mapping forward primer product 12 |
| SM040  | AAGAGGAGGAGAGATCAATACC                    | RT-PCR mapping forward primer product 13 |
| SM042  | ATCAGCATCAGTTGGCGG                        | RT-PCR mapping forward primer product 14 |
| SM046  | AAATGCCAAACCAACCG                         | RT-PCR mapping forward primer product 15 |
| SM048  | TATGACGGAACACTAGAATCTGC                   | RT-PCR mapping forward primer product 16 |
| SM050  | ATGGTAACGAAGAGCAGTTTCG                    | RT-PCR mapping forward primer product 17 |
| SM019  | CAATGCATTGCTGACGGAG                       | RT-PCR mapping reverse primer product 1  |
| SM021  | AACTCGACGTCGAACTCG                        | RT-PCR mapping reverse primer product 2  |
| SM070  | ACTCTATCGCAGCGTCAG                        | RT-PCR mapping reverse primer product 3  |
| SM030  | ATCAAACCTGGATCTTACGGC                     | RT-PCR mapping reverse primer product 4  |
| SM027  | TGCGCTTCCAGCTCATC                         | RT-PCR mapping reverse primer product 5  |
| SC2082 | CTGGCTGCGCTGTTGC                          | RT-PCR mapping reverse primer product 6  |
| SM032  | ATCGATGTTCCAGCTTGCCTTC                    | RT-PCR mapping reverse primer product 7  |
| SC2062 | TATAGGATCCCTCATGCTTTGCTCCCTTTG            | RT-PCR mapping reverse primer product 8  |
| GE003  | CTGGCACCTTCAACTTTTCAAG                    | RT-PCR mapping reverse primer product 9  |
| SC2068 | TATAGGATCCTTATTTTATGTAACCATATAGATGCTCGTTG | RT-PCR mapping reverse primer product 10 |
| SC2091 | TATAGGGCCCATCGGTTTGTGTTGCTGC              | RT-PCR mapping reverse primer product 11 |
| SC2270 | TATAGGGCCCTCCAGCTCCATCAGG                 | RT-PCR mapping reverse primer product 12 |
| SM041  | AACTGATGCTGATGATGGTGG                     | RT-PCR mapping reverse primer product 13 |
| SM052  | ATGTCGCGTACCACCACC                        | RT-PCR mapping reverse primer product 14 |
| SM047  | AAGCACTGCATCTGTAATGAAGG                   | RT-PCR mapping reverse primer product 15 |
| SM049  | AAACGAAACTGCTCTTCTGTTACC                  | RT-PCR mapping reverse primer product 16 |
| SM051  | AACATCTTTCATCTTGTCTGCTC                   | RT-PCR mapping reverse primer product 17 |

*Additional primers used for identification of T6SS genes in Sma ATCC274:*

|        |                              |                                   |
|--------|------------------------------|-----------------------------------|
| SM026  | ATGCTGTTTCTGCTCTGG           | Forward primer binding in SMA2252 |
| SC2112 | TATAGGTACCTTACCGGTCCTATGGCTG | Reverse primer binding in SMA2253 |
| SC2025 | ACGCCATTTCCGAGATCC           | Forward primer binding in SMA2254 |
| SC2026 | CGGTTCACTTTGTTATCTGTTG       | Reverse primer binding in SMA2254 |
| SC2183 | GTCAGCCTGGTCGATTTGG          | Forward primer binding in SMA2255 |
| SC2120 | TATAGGATCCCTACGGCAGCAGAAGGC  | Reverse primer binding in SMA2255 |
| GE07   | TGATGCAAGTGGAGTCTGG          | Forward primer binding in SMA2259 |
| GE08   | CGTCTTTTGTTCAGCGAAG          | Reverse primer binding in SMA2259 |
| GE009  | AAAAGCGGCCAGGTTCC            | Forward primer binding in SMA2267 |
| GE010  | TGCTGGCTGAACCTGGC            | Reverse primer binding in SMA2267 |
| SC2027 | GCAAAGCCAGTCGATCG            | Forward primer binding in SMA2270 |
| SC2019 | CTGCACCTGACCGAATACG          | Forward primer binding in SMA2273 |
| SC2022 | TGGTTCCAGGGTGTGGGAG          | Reverse primer binding in SMA2274 |
| SC2021 | ACTGTGCTGTTGACATCG           | Forward primer binding in SMA2274 |
| SC2020 | TTCTGATGCTGGCAC              | Reverse primer binding in SMA2275 |
