# Supplementary material
Source: PubMed Central journal article supplement (PMC3194891)
Supplement: supp_193_21_6057__3.pdf [file supp_193_21_6057__3.pdf]

**Supplementary Table 2. Genomic co-ordinates for the CDSs in the Type VI secretion system gene cluster in *S. marcescens* Db11.**

| <b>Identifier</b> | <b>Genomic co-ordinates<br/><i>S. marcescens</i> Db11</b> |
|-------------------|-----------------------------------------------------------|
| SMA2244           | 2365103:2367463                                           |
| SMA2245           | 2367474:2367863                                           |
| SMA2246           | 2367965:2368465                                           |
| SMA2247           | 2368637:2371189                                           |
| SMA2248           | 2371186:2372253                                           |
| SMA2249           | 2372284:2372919                                           |
| SMA2250           | 2372936:2373328                                           |
| SMA2251           | 2373377:2373877                                           |
| SMA2252           | 2373907:2374437                                           |
| SMA2253           | 2374478:2375824                                           |
| SMA2254           | 2375828:2377048                                           |
| SMA2255           | 2377048:2380683                                           |
| SMA2256           | 2380702:2381421                                           |
| SMA2257           | 2381445:2382476                                           |
| SMA2258           | 2382597:2383133                                           |
| SMA2259           | 2383137:2384642                                           |
| SMA2260           | 2384710:2385093                                           |
| SMA2261           | 2385090:2385581                                           |
| SMA2262           | 2385581:2386036                                           |
| SMA2263           | 2386232:2386714                                           |
| SMA2264           | 2386769:2387245                                           |
| SMA2265           | 2387230:2387604                                           |
| SMA2266           | 2387650:2388009                                           |
| SMA2267           | 2388490:2390232                                           |
| SMA2268           | 2390232:2391005                                           |
| SMA2269           | 2391034:2392020                                           |
| SMA2270           | 2392036:2392857                                           |
| SMA2271           | 2392860:2393435                                           |
| SMA2272           | 2393440:2395326                                           |
| SMA2273           | 2395323:2396393                                           |
| SMA2274           | 2396450:2399104                                           |
| SMA2275           | 2399154:2400599                                           |
| SMA2276           | 2400742:2402670                                           |
| SMA2277           | 2402725:2403165                                           |
| SMA2278           | 2403168:2407589                                           |
| SMA2278A          | 2407591:2408079                                           |
| SMA2280           | 2408255:2408632                                           |
| SMA2281           | 2408686:2409372                                           |

The complete genome sequence is available at <http://www.sanger.ac.uk/resources/downloads/bacteria/serratia-marcescens.html>
